# Supplementary material for: A controlled Ag–Au bimetallic nanoshelled microsphere array and its improved surface-enhanced Raman scattering effect
Source: Royal Society of Chemistry journal article supplement (doi:10.1039/c3ra47882c), 2014-01-01
Supplement: c3ra47882c.pdf [file c3ra47882c.pdf]

## Supporting Information

### Controlled Ag-Au bimetallic nanoshelled microsphere array and its improved surface-enhanced Raman scattering effect

Jingjing Wang,<sup>‡</sup> Fei Zhou,<sup>‡</sup> Guotao Duan,<sup>\*</sup> Yue Li, Guangqiang Liu, Fuhai Su and

Weiping Cai<sup>\*</sup>

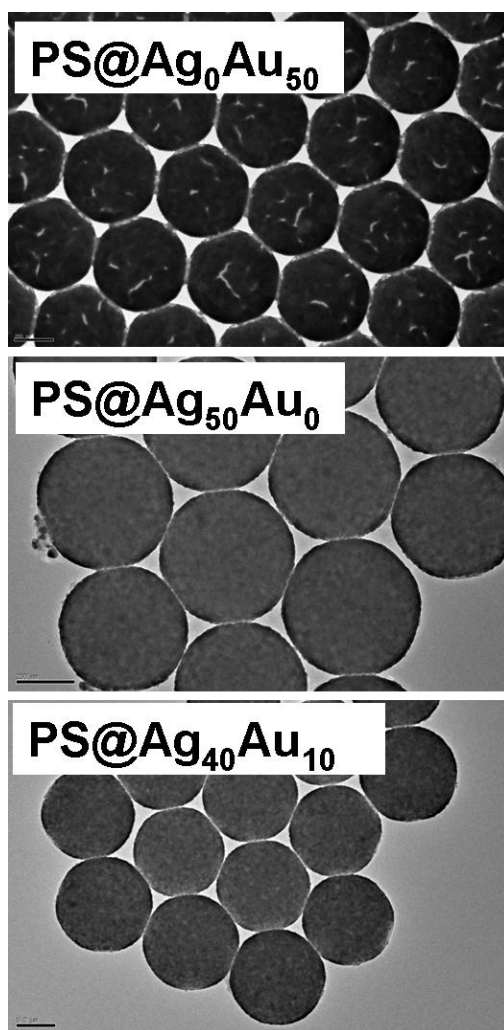

**Figure S1** TEM images of PS@Ag<sub>0</sub>Au<sub>50</sub>, PS@Ag<sub>50</sub>Au<sub>0</sub>, PS@Ag<sub>40</sub>Au<sub>10</sub> microspheres.

<sup>\*</sup> Key Lab of Materials Physics, Anhui Key lab of Nanomaterials and Nanotechnology, Institute of Solid State Physics, Chinese Academy of Sciences, Hefei, 230031, Anhui, P. R. China.

E-mail: [duangt@issp.ac.cn](mailto:duangt@issp.ac.cn); [wpcai@issp.ac.cn](mailto:wpcai@issp.ac.cn)

<sup>‡</sup> These authors should be addressed as co-first authors.
